# Supplementary material for: Photoelectrochemical behaviour of anatase nanoporous films: effect of the nanoparticle organization
Source: Royal Society of Chemistry journal article supplement (doi:10.1039/c0nr00140f), 2010-01-01
Supplement: c0nr00140f.pdf [file c0nr00140f.pdf]

Electronic Supplementary Information (ESI) Available

## **Photoelectrochemical behaviour of anatase nanoporous films: effect of the nanoparticle organization**

Teresa Lana-Villarreal<sup>a\*</sup>, Yuanbing Mao<sup>b</sup>, Stanislaus S. Wong<sup>b</sup>, and Roberto Gómez<sup>a</sup>

<sup>a</sup>Institut Universitari d'Electroquímica i Departament de Química Física, Universitat d'Alacant, Apartat 99, E-03080 Alacant, Spain

<sup>b</sup>Department of Chemistry, State University of New York at Stony Brook, Stony Brook, New York 11794-3400, and Condensed Matter Physics and Materials Science Department, Brookhaven National Laboratory, Building 480, Upton, New York 11973, USA

|                                                                                                                                                                                                     |    |
|-----------------------------------------------------------------------------------------------------------------------------------------------------------------------------------------------------|----|
| 1. Typical spectral irradiance of a 150 W Xe arc lamp.....                                                                                                                                          | 2  |
| 2. Transmission Electron Microscopy Images of wire-like nanoparticle aggregates.....                                                                                                                | 3  |
| 3. Electrode Raman spectra.....                                                                                                                                                                     | 4  |
| 4. XRD patterns of the anatase thin films.....                                                                                                                                                      | 5  |
| 5. Cyclic voltammograms obtained at different scan rates.....                                                                                                                                       | 6  |
| 6. Cyclic voltammograms obtained for randomly distributed anatase nanoparticles after different thermal treatments .....                                                                            | 7  |
| 7. Cyclic voltammograms in 0.1 M HClO <sub>4</sub> under illumination, in the presence and in the absence of oxygen for random distributed nanoparticles and wire-like nanoparticle aggregates..... | 8  |
| 8. Modified Kubelka-Munk function and Incident Photon to Current Efficiency versus light intensity.....                                                                                             | 9  |
| 9. Cyclic voltammograms in 0.1 M HClO <sub>4</sub> in the dark and under illumination for NP and NC electrodes with similar film thickness.....                                                     | 10 |

**1. Typical spectral irradiance of a 150 W Xe arc lamp**

The data can be found at the Newport webpage (<http://www.newport.com>), concretely at: [http://search.newport.com/?q=\\*&x2=sku&q2=6253](http://search.newport.com/?q=*&x2=sku&q2=6253). It corresponds with the Xe short arc bulb fabricated by Osram, model XBO 150W/1.

## 2. Transmission Electron Microscopy Images of wire-like nanoparticle aggregates

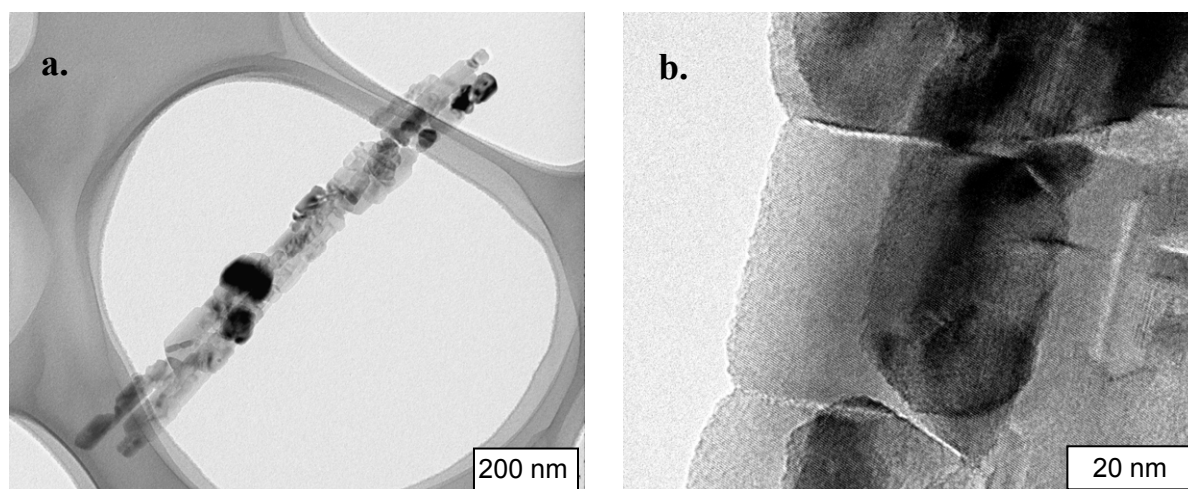

**Figure S1:** Transmission Electron Microscopy image of a wire-like nanoparticle aggregate (a). Magnified detail of intergrain boundaries (b). The images were obtained from the as-synthesized nanopowder.

### 3. Electrode Raman spectra

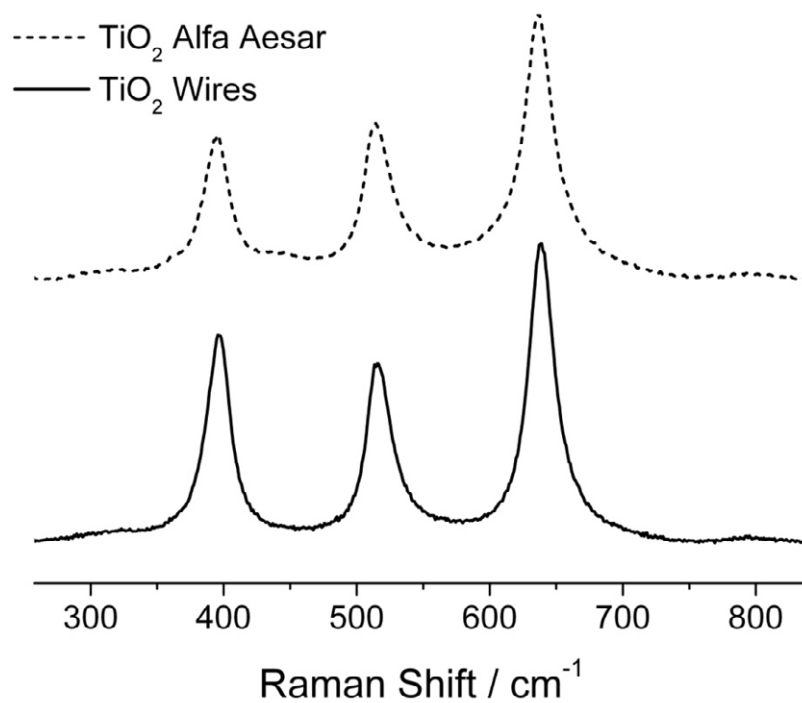

**Figure S2.** Raman spectra of TiO<sub>2</sub> wire-like nanocrystal aggregates and commercial TiO<sub>2</sub> nanoparticle (Alfa Aesar) thin films deposited on conducting glass.

#### 4. XRD patterns of the anatase thin films

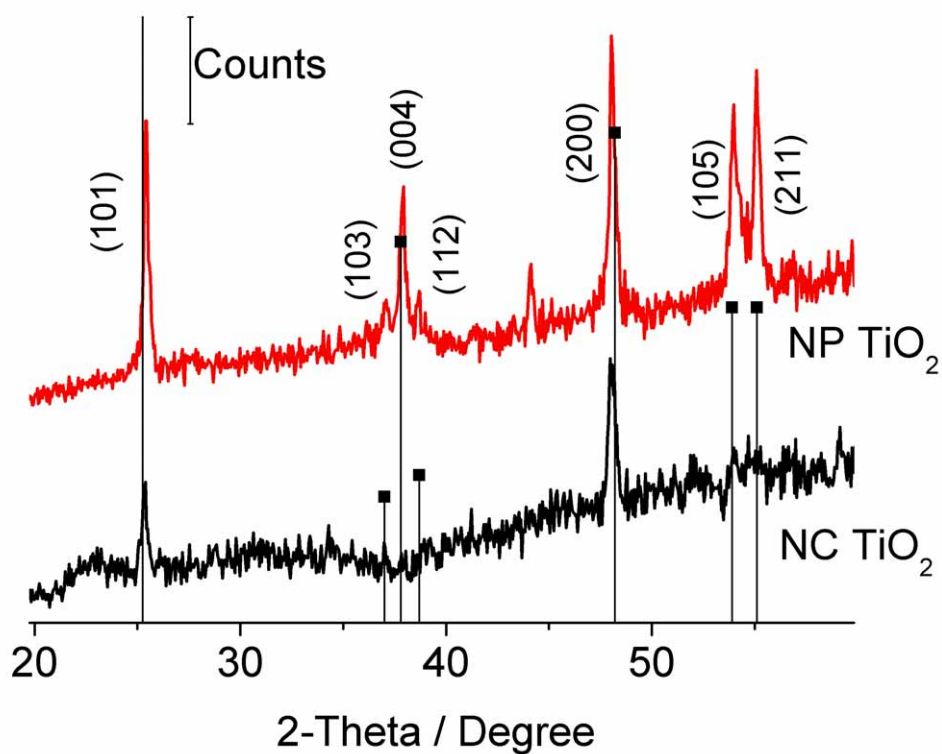

**Figure S3.** XRD patterns of a nanoparticulate (NP TiO<sub>2</sub>) and a nanocolumnar (NC TiO<sub>2</sub>) anatase thin film deposited on a fused silica substrate. The smaller peak intensity for the NC TiO<sub>2</sub> layer can be attributed to a smaller amount of material present in the film. A more intense diffractogram for this sample can be found in reference 22.

5. Cyclic voltammograms obtained at different scan rates

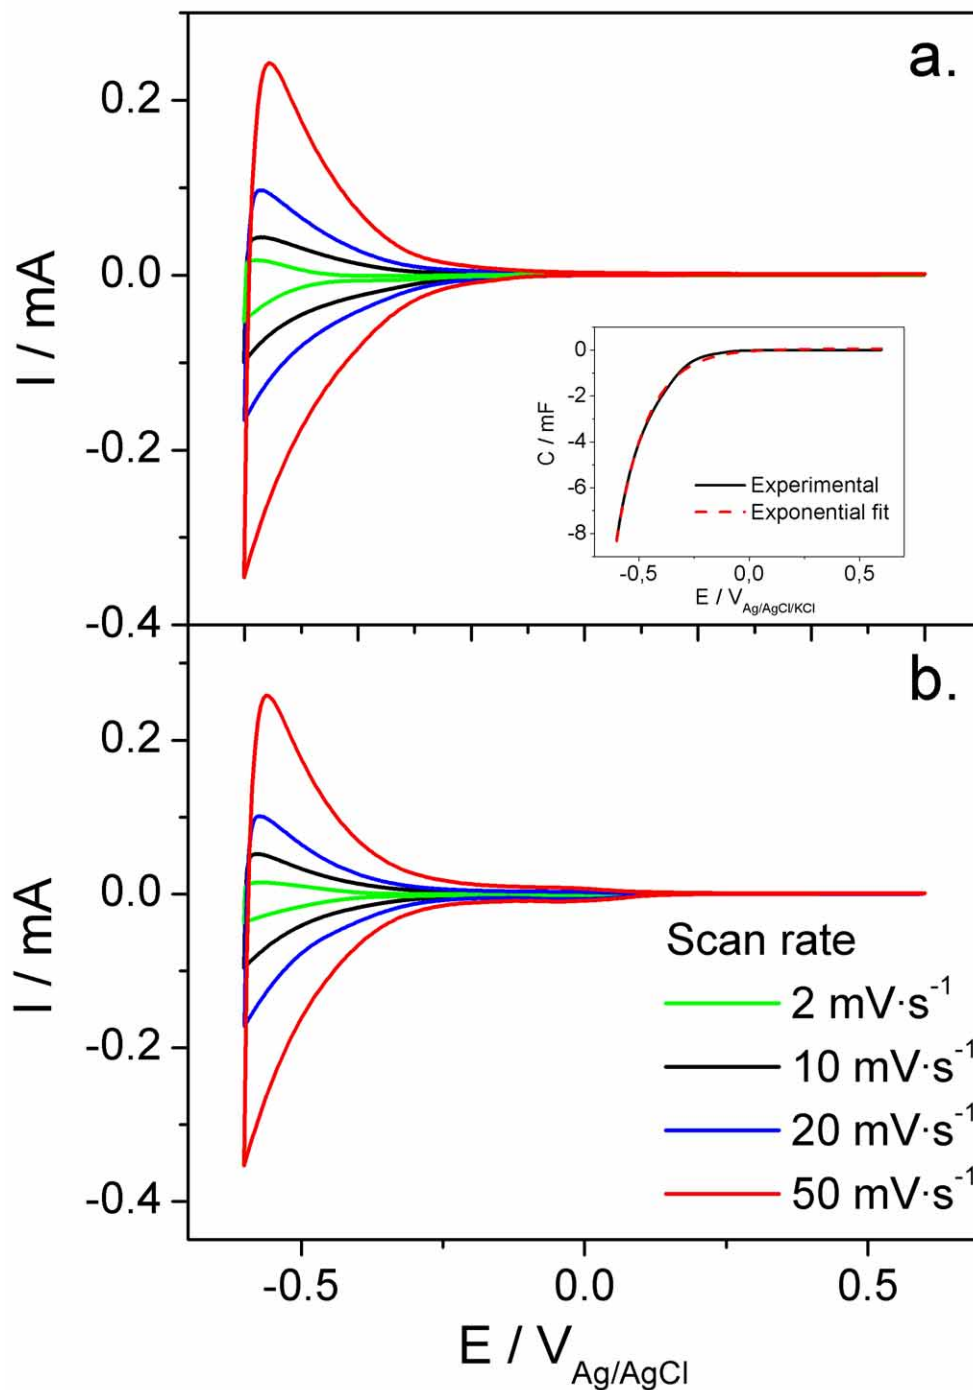

**Figure S4.** Cyclic voltammetry of a NC electrode (~5  $\mu\text{m}$ ) (a) and a NP electrode (~0.7  $\mu\text{m}$ ) (b) in the dark at different scan rates. Electrolyte: nitrogen purged 0.1 M  $\text{HClO}_4$ . The inset of Figure a. shows the dependence of the capacitance on the applied potential for the NC electrode.

6. Cyclic voltammograms obtained for randomly distributed anatase nanoparticles after different thermal treatments

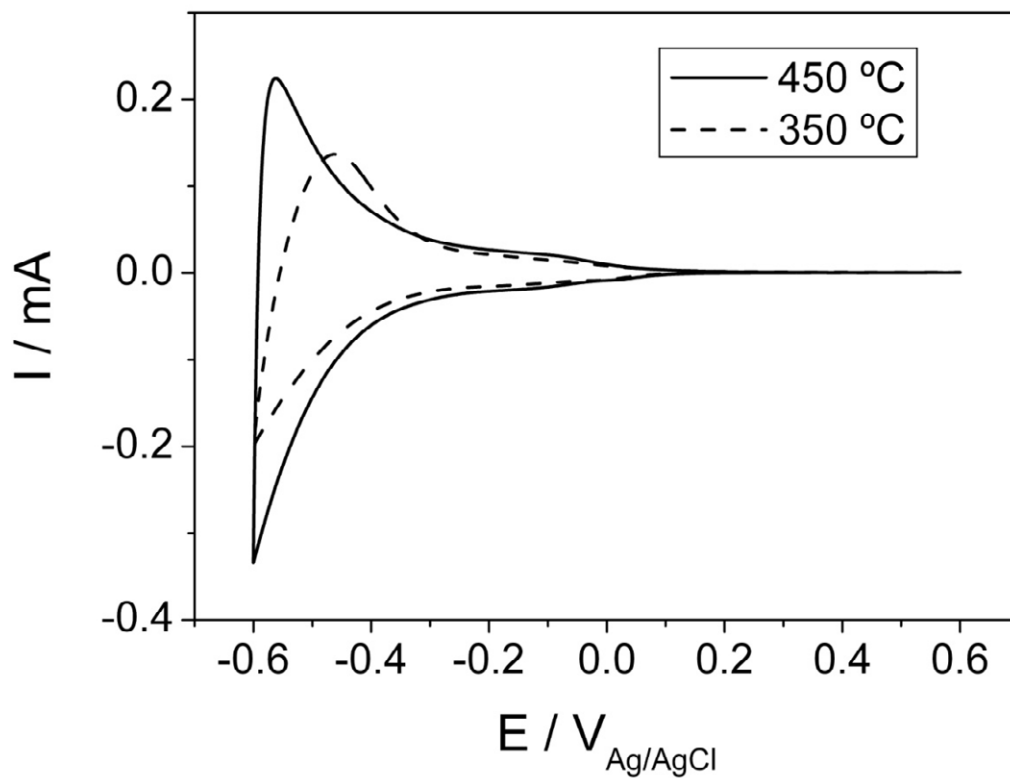

**Figure S5.** Cyclic voltammograms for a NP electrode in the dark after thermal treatment at either 350°C or 450°C. Electrolyte: nitrogen purged 0.1 M HClO<sub>4</sub>, scan rate: 20 mV·s<sup>-1</sup>. Electrode area ~2 cm<sup>2</sup>.

7. Cyclic voltammograms in 0.1 M HClO<sub>4</sub> under illumination, in the presence and in the absence of oxygen for randomly distributed nanoparticles and wire-like nanoparticle aggregates

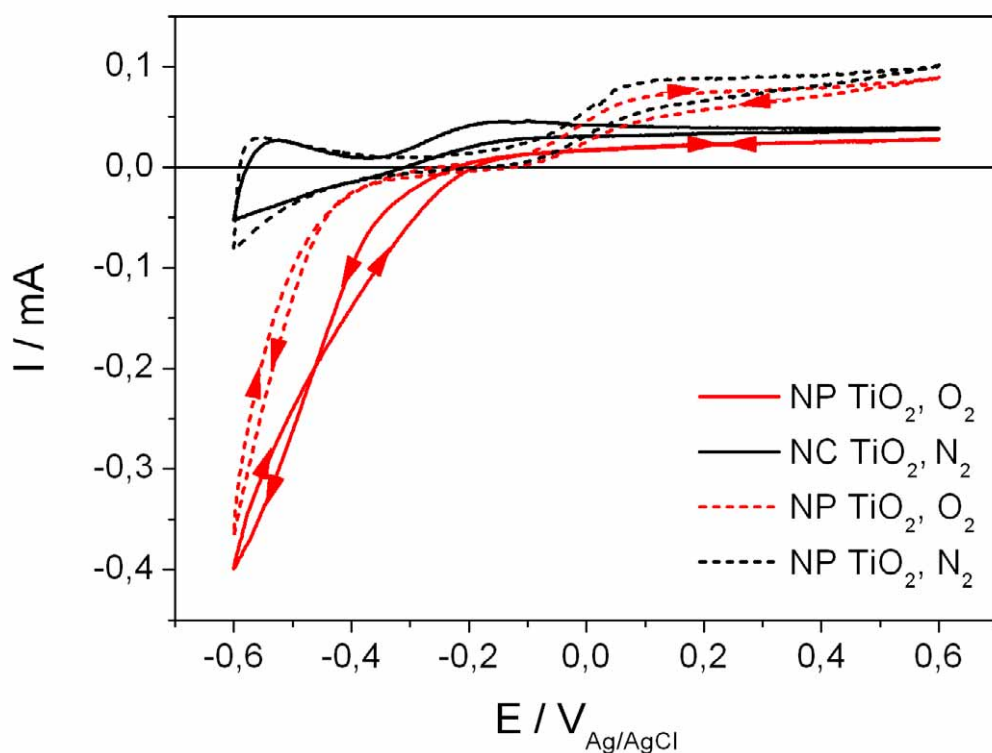

**Figure S6.** Cyclic voltammetry of a wire-like nanocrystal aggregate electrode ( $\sim 6 \mu\text{m}$ ) and a randomly distributed nanoparticulate electrode ( $\sim 1 \mu\text{m}$ ) (Alfa Aesar) under UV-visible polychromatic illumination ( $660 \text{ mW}\cdot\text{cm}^{-2}$ ). Electrolyte: oxygen (red) or nitrogen (black) purged 0.1 M HClO<sub>4</sub>; Scan rate:  $20 \text{ mV}\cdot\text{s}^{-1}$ ; The experiments were performed using a compact TiO<sub>2</sub> blocking layer.



8. Modified Kubelka-Munk function and modified Incident Photon to Current Efficiency (IPCE) versus light intensity

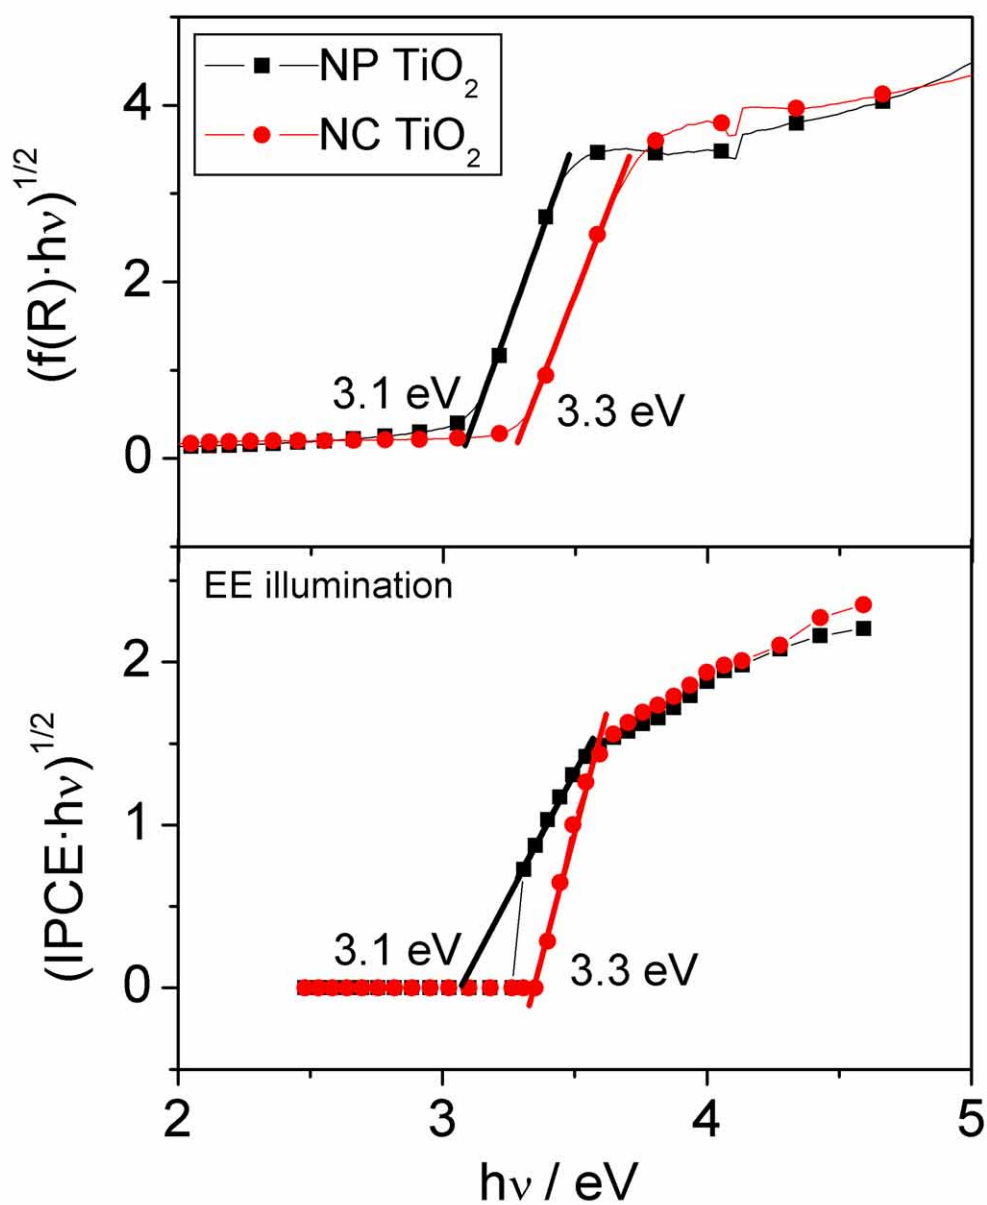

**Figure S7.**  $(\text{IPCE} \cdot h\nu)^{1/2}$  and (transformed reflectance according to Kubelka Munk equation  $(F(R)) \cdot h\nu)^{1/2}$  as a function of  $h\nu$  (photon energy). The IPCE was measured in the presence of formic acid at  $0.6 \text{ V}_{\text{Ag}/\text{AgCl}}$ .

9. Cyclic voltammograms in 0.1 M HClO<sub>4</sub> in the dark and under illumination for NP and NC electrodes with similar film thickness

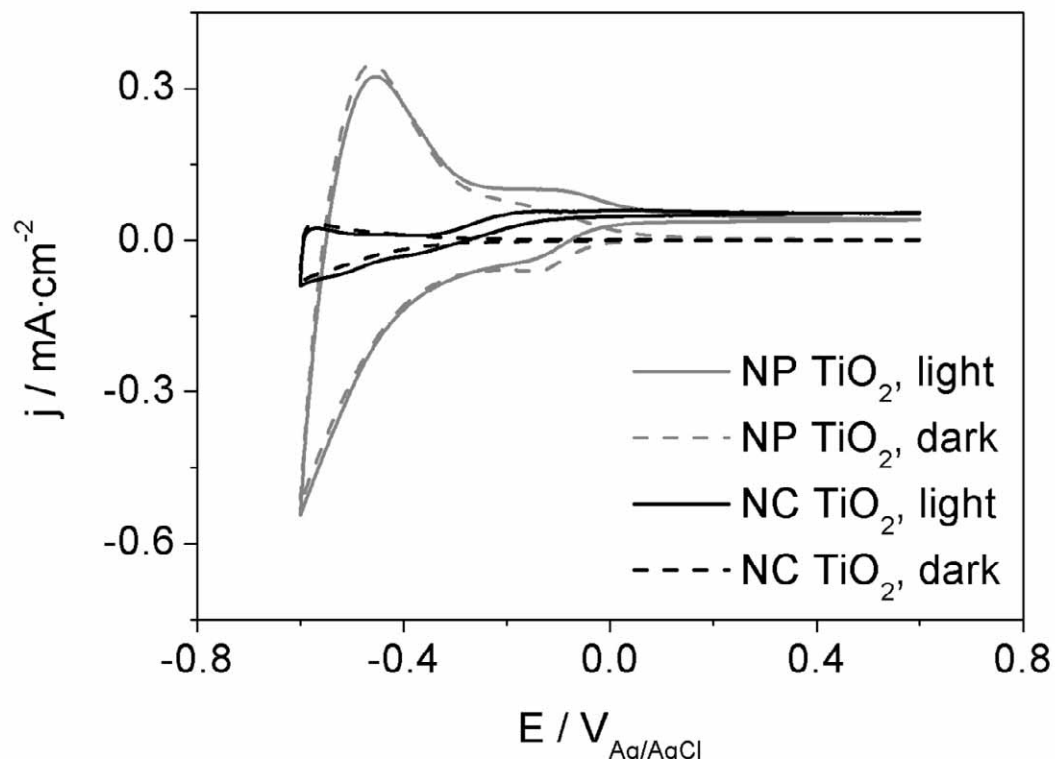

Figure S8. Cyclic voltammograms in 0.1 M HClO<sub>4</sub> in the dark. Scan rate: 20 mV·s<sup>-1</sup>
